# Supplementary material for: Characterization of Immune Responses to SARS-CoV-2 and Other Human Pathogenic Coronaviruses Using a Multiplex Bead-Based Immunoassay
Source: MDPI journal article supplement (doi:10.3390/vaccines9060611), 2021-06-07
Supplement: s1 [file s1]

Table S1. demographic and baseline serological characteristics of the study participants

| Variables                                      | Seropositive (n=458)* | Seronegative (n=52) | Blood donors (n=110)** |
|------------------------------------------------|-----------------------|---------------------|------------------------|
| <b>Age, mean (SD)</b>                          | 40. 7 (18.9)          | 46. 8 (13.4)        | 37.6 (19.2)            |
| <b>Sex</b>                                     |                       |                     |                        |
| Male, n (%)                                    | 234 (65)              | 26 (50)             | 42 (38.2)              |
| Female, n (%)                                  | 223 (48.7)            | 26 (50)             | 62 (56.4)              |
| <b>Serological data</b>                        |                       |                     |                        |
| Anti S IgG positive (n,%)                      | 425 (92.8)            | 4 (7.7)             | 5 (4.2)                |
| Anti N IgG positive (n,%)                      | 414 (90.4)            | 2 (3.8)             | 7 (6.4)                |
| <b>Neutralization test</b>                     |                       |                     |                        |
| Total tested                                   | 144                   | 19                  | 12 <sup>§§</sup>       |
| Neutralization titer > 1:4 (n,<br>% of tested) | 138 (95.8)            | 0                   | 0 (0)                  |

\* data on sex missing for one person, \*\* data on age and sex missing for 6 persons, § classified as seronegative since both IgG assays were negative

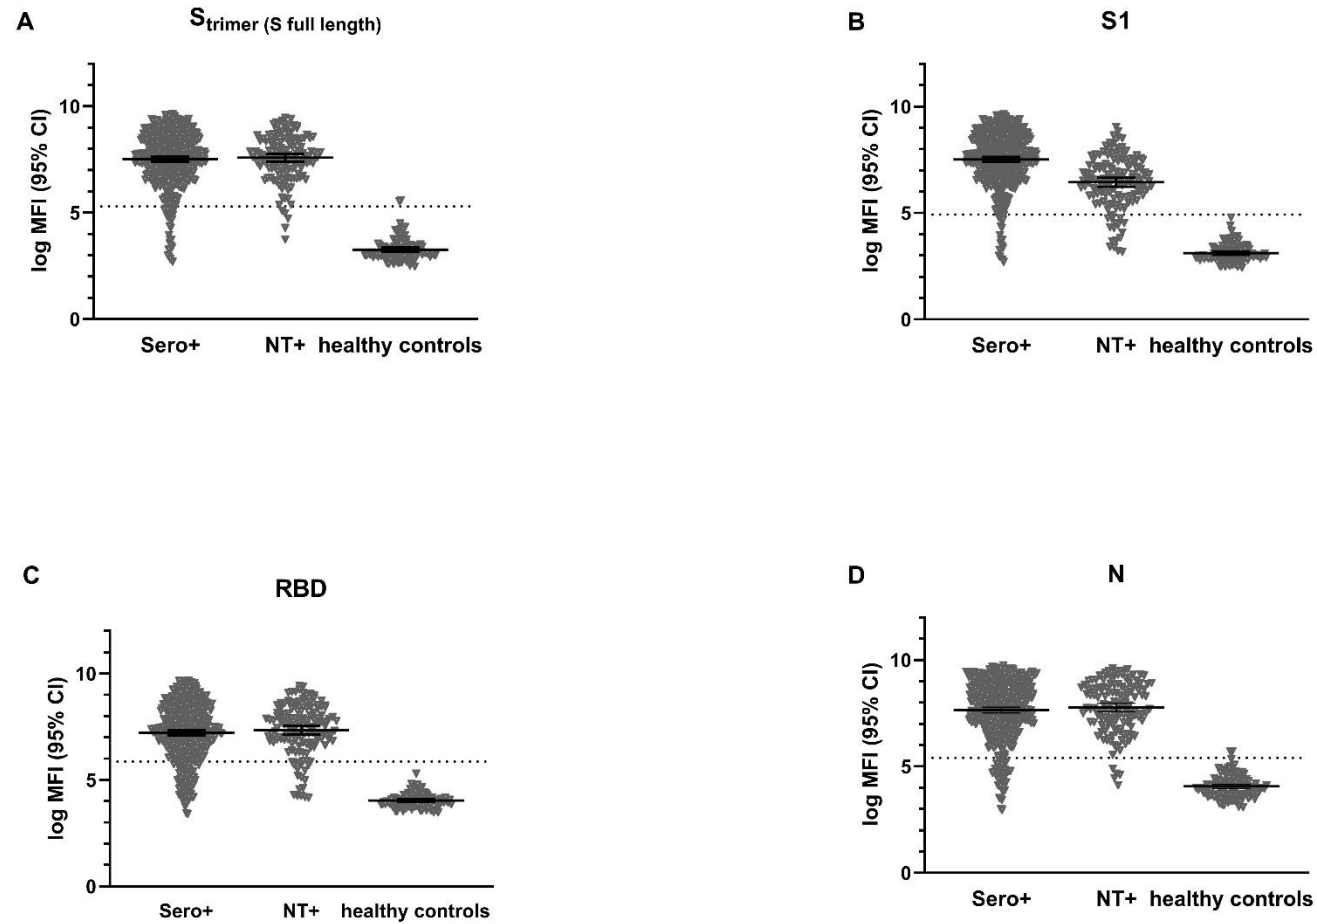

**Figure S1.** Mean (95% CI) antibody response to four antigenic targets of SARS-CoV-2 among seropositive individuals and healthy controls. Sero+ (n=458) represents seropositive individuals irrespective of neutralization status, NT+ (n= 138) represents seropositive individuals with positive neutralization titer. Healthy controls (n=110) are blood donors from a pre-SARS-CoV-2 era. Dotted horizontal lines represent cutoff values for positivity for each antigenic target (Strimer >5.29, S1 >4.92, RBD >5.86 und N > 5.40). Strimer = Spike protein trimer, S1 = S1 subunit of spike protein, RBD = receptor binding domain of spike protein, N = nucleocapsid.
